# Supplementary material for: Intelligent assessment of surrounding rock grade of tunnel face based on multi-scale geological feature enhancement and deep convolutional network
Source: Research Square preprint supplement (doi:10.21203/rs.3.rs-8615720/v1), 2026-01-20
Supplement: Supplementary file 1 [file 8cd962f8eb4fda0fc9d1d706.docx]

# Picture

| 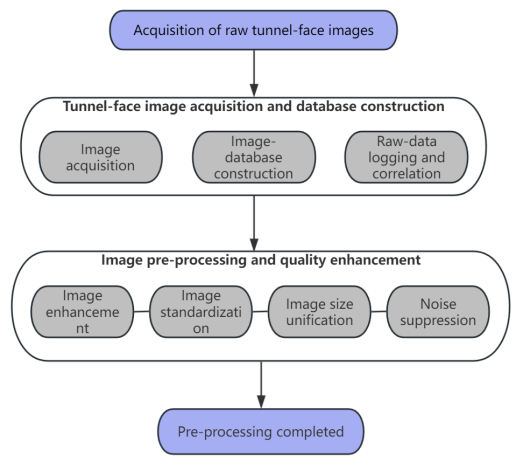 |
| --- |
| **Fig. 1** Palm Face Image Preprocessing Flowchart |

| 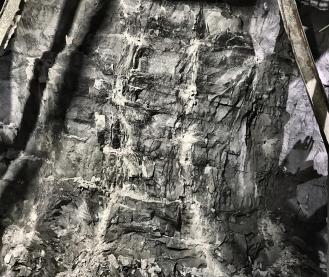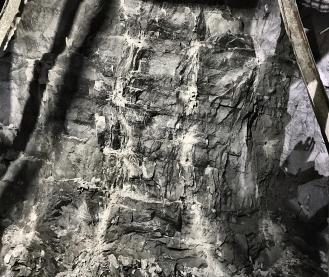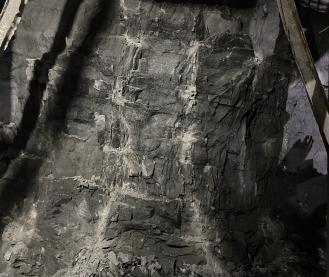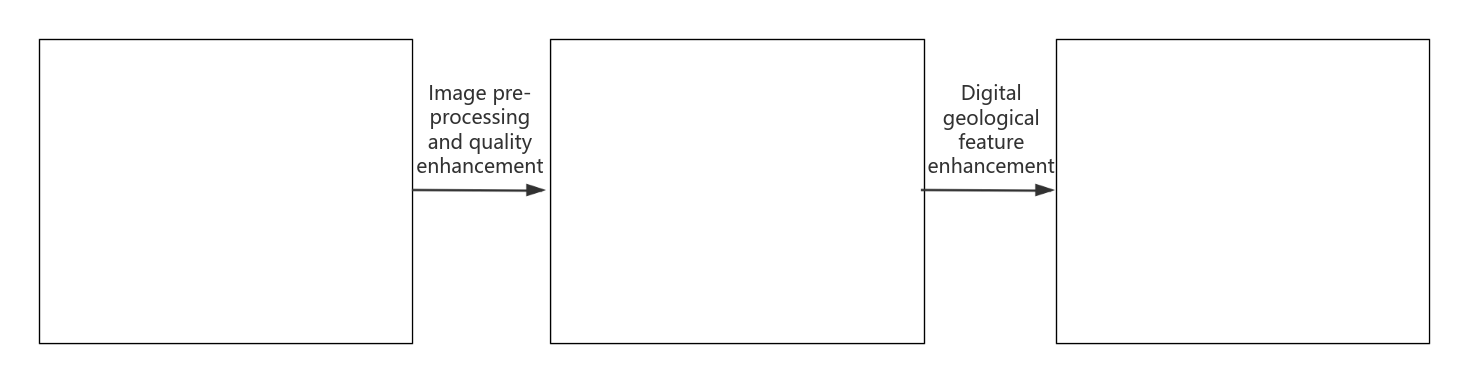 |
| --- |
| **(a)** Raw image **(b)** Pre-processed image **(c)** Digitally geologically-enhanced image |
| **Fig. 2** Schematic diagram of progressive enhancement of tunnel palm face images |

| 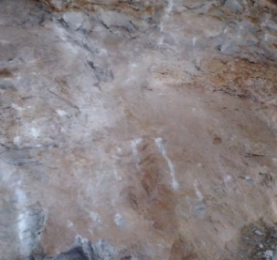 | | 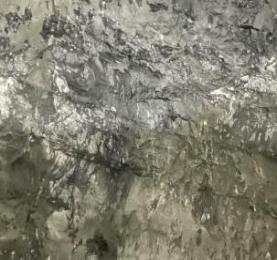 | | 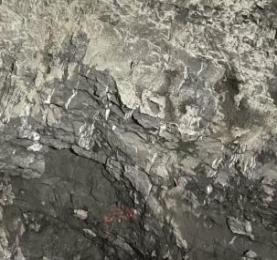 | |
| --- | --- | --- | --- | --- | --- |
| **(a)** Joints undeveloped | | **(b)** Joints moderately developed | | **(c)** Joints well-developed | |
| 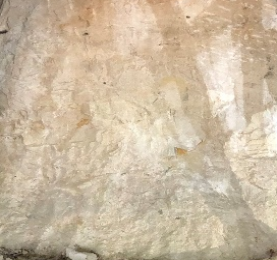 | 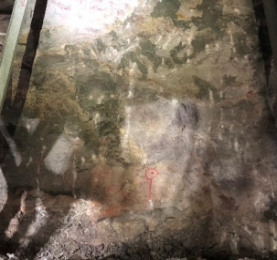 | | 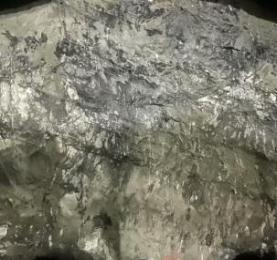 | | 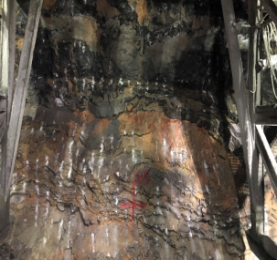 | |
| **(d)** Rock mass unweathered | **(e)** Rock mass slightly weathered | | **(f)** Moderately weathered rock | | **(g)** Rock mass highly weathered | |
| 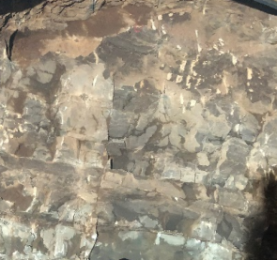 | 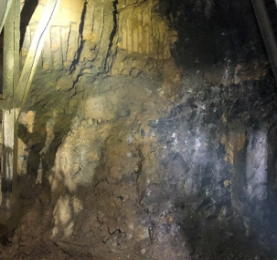 | | 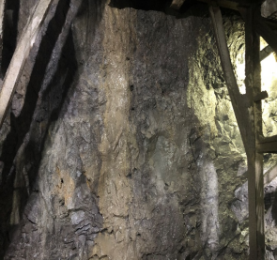 | | 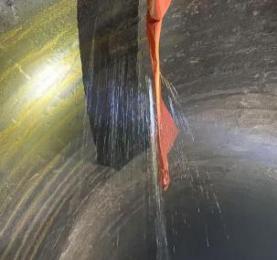 | |
| **(h)** Dry | **(i)** Moist | | **(j)** Seepage | | **(k)** Inflow | |
| Fig. 3 Example image of palm face features | | | | | | |

| 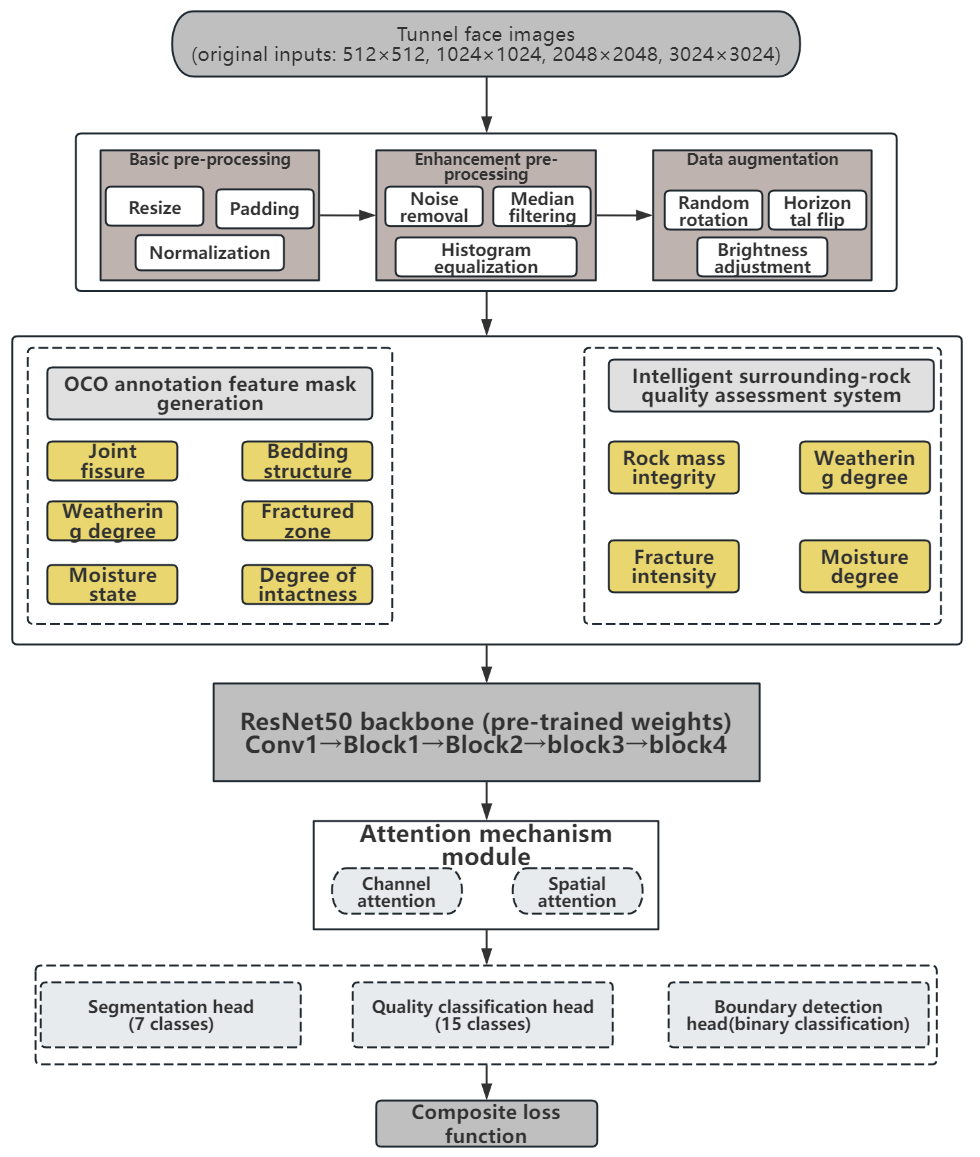 |
| --- |
| Fig.4 Overall flowchart of the intelligent assessment system of the enclosure rock level |

| 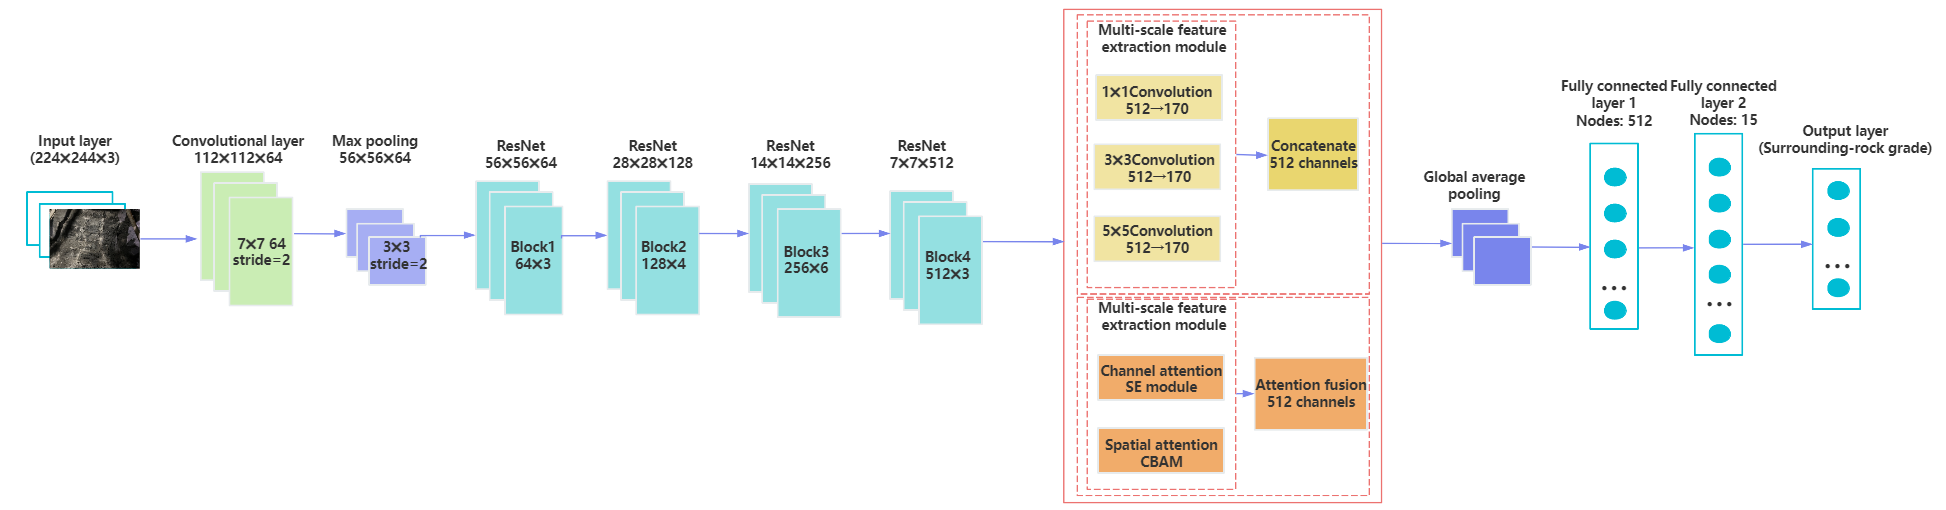 |
| --- |
| **Fig. 5** Improved ResNet convolutional neural network architecture diagram |

| 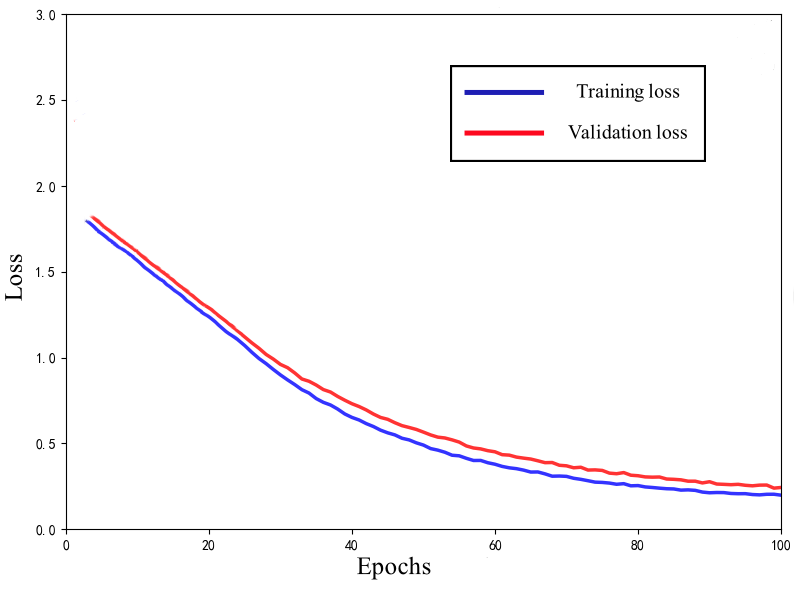 | 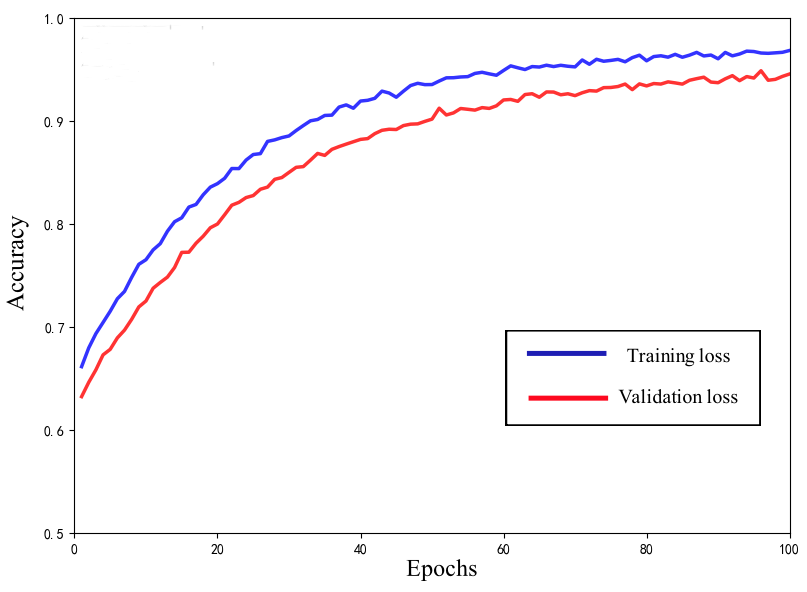 |
| --- | --- |
| **(a)** Training-loss convergence curve of the improved ResNet | **(b)** Accuracy convergence curve of the improved ResNet |
| **Fig. 6** Improved loss vs. accuracy convergence curves for ResNet models | |

| 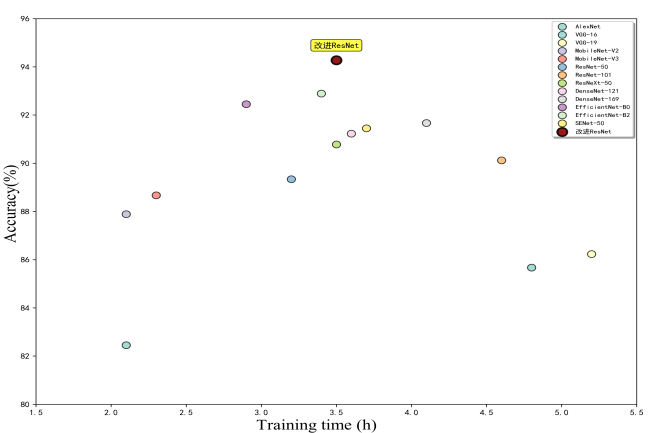 | 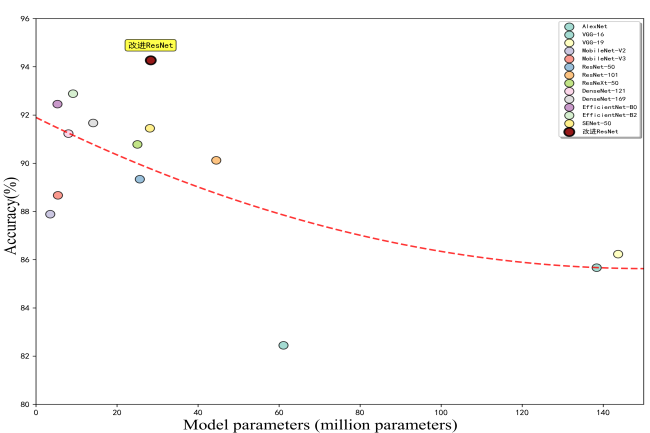 |
| --- | --- |
| **(a)** Efficiency-performance trade-off | **(b)** Accuracy-vs-parameters regression |
| **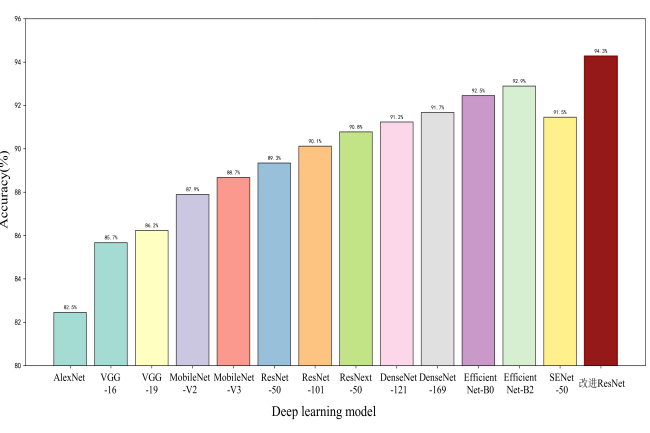** | **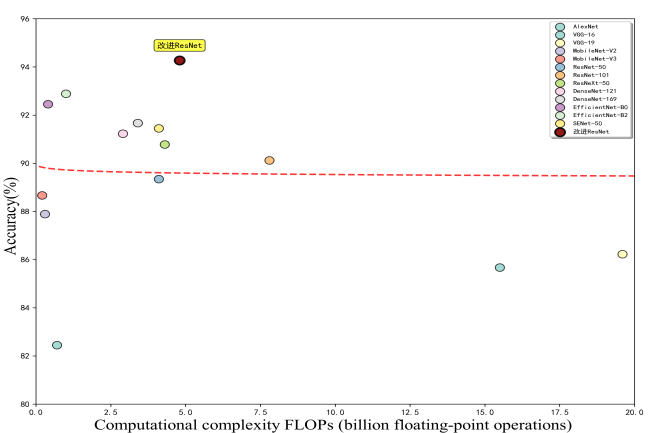** |
| **(c)** Accuracy comparison across models | **(d)** Accuracy-complexity regression |
| **Fig. 7** Multi-dimensional evaluation and analysis of the performance of each model | |

| 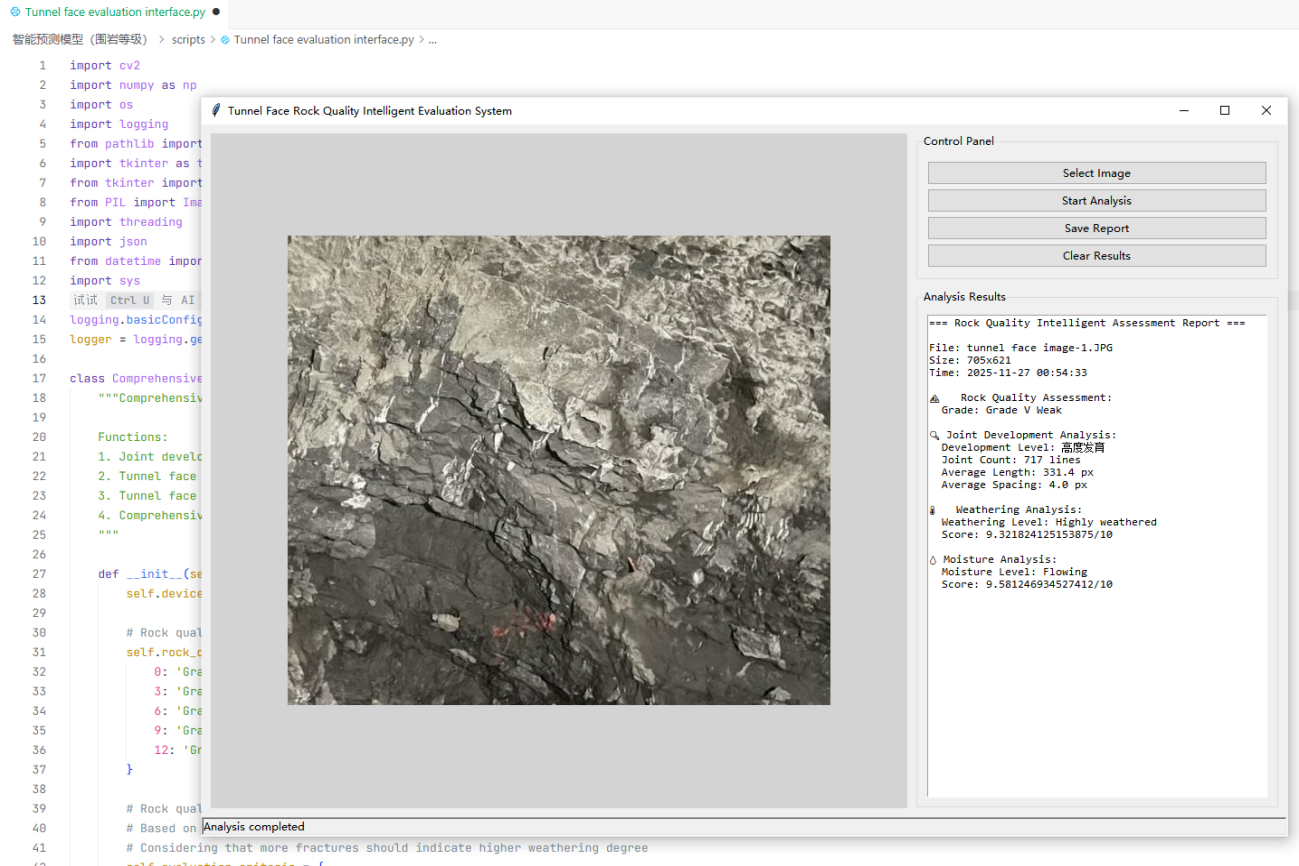 |
| --- |
| **Fig. 8** Output results of parameters of surrounding rock properties |

# Table

**Table 1** Data distribution

| Factor | Surrounding Rock Characteristic Factor | Specific classification method | Training set | Validation set | Test set |
| --- | --- | --- | --- | --- | --- |
| Joint spacing | undeveloped | 1–2 sets, > 1 m | 1 400 | 300 | 300 |
| moderately developed | 1–3 sets, 0.2–1.0 m | 1 400 | 300 | 300 |
| highly developed | ≥ 3 sets, < 0.5 m | 1 400 | 300 | 300 |
| Weathering | fresh | slight discoloration along joints | 1 400 | 300 | 300 |
| slightly weathered | secondary minerals, blocky | 1 400 | 300 | 300 |
| moderately weathered | altered, fractured blocks | 1 400 | 300 | 300 |
| highly weathered | soil-like, discoloured | 1 400 | 300 | 300 |
| Water inflow | dry | no moisture | 1 400 | 300 | 300 |
| damp | local wet spots | 1 400 | 300 | 300 |
| seepage | continuous trickle | 1 400 | 300 | 300 |
| inflow | visible water jet | 1 400 | 300 | 300 |

**Table 2** Comprehensive comparative analysis of multi-model performance

| Model | Acc/% | Prec/% | Rec/% | F1/% | Params/M | FLOPs/G |
| --- | --- | --- | --- | --- | --- | --- |
| AlexNet | 82.45 | 82.12 | 81.89 | 82.00 | 61.1 | 0.7 |
| VGG-16 | 85.67 | 85.23 | 85.01 | 85.12 | 138.4 | 15.5 |
| VGG-19 | 86.23 | 85.89 | 85.67 | 85.78 | 143.7 | 19.6 |
| ResNet-50 | 89.34 | 89.12 | 88.95 | 89.03 | 25.6 | 4.1 |
| ResNet-101 | 90.12 | 89.87 | 89.73 | 89.8 | 44.5 | 7.8 |
| ResNeXt-50 | 90.78 | 90.45 | 90.32 | 90.38 | 25.0 | 4.3 |
| DenseNet-121 | 91.23 | 90.98 | 90.87 | 90.92 | 8.0 | 2.9 |
| DenseNet-169 | 91.67 | 91.34 | 91.21 | 91.27 | 14.1 | 3.4 |
| EfficientNet-B0 | 92.45 | 92.18 | 92.03 | 92.10 | 5.3 | 0.4 |
| EfficientNet-B2 | 92.89 | 92.67 | 92.54 | 92.60 | 9.1 | 1.0 |
| MobileNet-V2 | 87.89 | 87.45 | 87.23 | 87.34 | 3.5 | 0.3 |
| MobileNet-V3 | 88.67 | 88.34 | 88.12 | 88.23 | 5.4 | 0.2 |
| SENet-50 | 91.45 | 91.23 | 91.08 | 91.15 | 28.1 | 4.1 |
| Improving ResNet | 94.27 | 94.16 | 94.09 | 94.12 | 28.3 | 4.8 |

**Table 3** Multi-metric evaluation of classification performance for each surrounding-rock class using the improved ResNet model

| Rock class | Samples | Acc/% | Prec /% | Rec/% | F1 /% | Key features |
| --- | --- | --- | --- | --- | --- | --- |
| I (hard) | 799 | 96.73 | 96.45 | 96.32 | 96.38 | intact, no visible joints |
| II (firm) | 1 019 | 94.87 | 94.56 | 94.23 | 94.39 | few joints, fairly intact |
| III (soft) | 1 399 | 93.69 | 93.34 | 93.12 | 93.23 | moderately jointed, fissured |
| IV (weak) | 1 163 | 92.98 | 92.67 | 92.45 | 92.56 | highly jointed, fractured |
| V (very weak) | 617 | 95.24 | 94.89 | 94.76 | 94.82 | heavily broken, block-in-matrix |

**Table 4** Comparison of judgment results of palm face images based on improved ResNet models

| Face image (chainage) | Expert grade | Model grade | Face image (chainage) | Expert grade | Model grade |
| --- | --- | --- | --- | --- | --- |
| 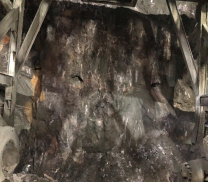 | Grade IV  (strong) | Grade V (weak) | 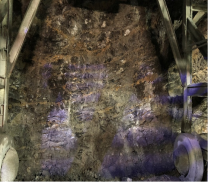 | Grade IV  (strong) | Grade V  (weak) |
| K2+315 | K3+177 |
| 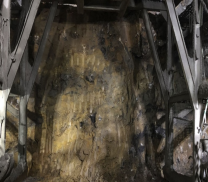 | Grade V (strong) | Grade V (strong) | 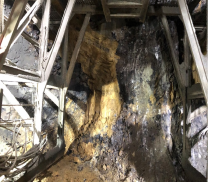 | Grade V (strong) | Grade V (strong) |
| K4+566 | ZK4+528 |
| 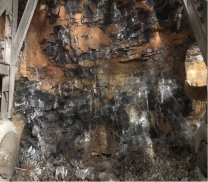 | Grade V  (weak) | Grade V (weak) | 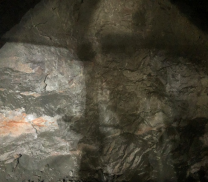 | Grade IV  (strong) | Grade IV  (strong) |
| ZK6+725 | ZK9+103 |
